# Supplementary material for: P149 Fruit and Vegetable Consumption of Michigan Youth and Adults: Locally Implemented SNAP-Ed Programs with Aggregated Impact
Source: Elsevier journal article supplement (doi:10.1016/j.jneb.2020.04.196), 2020-07-01
Supplement: mmc70 [file mmc70.pdf]

P149 Fruit and Vegetable Consumption of Michigan Youth and Adults: Locally Implemented SNAP-Ed Programs with Aggregated Impact - Journal of Nutrition Education and Behavior               


Skip to Main Content

ADVERTISEMENT

SCROLL TO CONTINUE WITH CONTENT

Open GPT Console  
Open Oracle Keywords  
  
Refresh Values

| Property | Value |
| --- | --- |
| Status |  |
| Version |  |
| Ad File |  |
| Disable Ads Flag |  |
| Environment |  |
| Moat Init |  |
| Moat Ready |  |
| Contextual Ready |  |
| Contextual URL |  |
| Contextual Initial Segments |  |
| Contextual Used Segments |  |
| AdUnit |  |
| SubAdUnit |  |
| Custom Targeting |  |
| Ad Events |  |
| Invalid Ad Sizes |  |

*Close*

- Home
- Articles & Issues
  - Back
  - Articles In Press
  - Current Issue
  - List of Issues
  - Supplements
- For Authors
  - Back
  - Author Guidelines
  - Submit Your Manuscript
  - Statistical Methods
  - Guidelines for Authors of Educational Material Reviews
  - Permission to Reuse
  - About Open Access
  - Researcher Academy
- For Reviewers
  - Back
  - General Guidelines
  - Methods Paper Guidelines
  - Qualitative Guidelines
  - Quantitative Guidelines
  - Questionnaire Methods Guidelines
  - Perspective Guidelines
  - Statistical Methods Guidelines
  - Systematic Review Guidelines
  - GEM Guidelines
- Journal Info
  - Back
  - About the Journal
  - Policies
  - Disclosures
  - Editorial Staff and Board
  - Statistical Reviewers
  - Contact Information
  - Awards
  - Reviewer Appreciation
  - Abstracting/Indexing
  - Impact/Metrics
  - Info for Advertisers
  - Sponsored Supplements
  - Pricing
  - Reprints
- Media
- New Resources
  - Back
  - New Resources for Nutrition Educators
  - Submit New Resources for Review
  - Guidelines for Writing Reviews of New Resources for Nutrition Educators
- Podcast/Webinars
  - Back
  - New Resources Podcasts
  - Press Release & Other Podcasts
  - Webinars
- Collections
  - Back
  - Special Interest
  - Article Types
  - Themed Issues
  - Position Papers
  - Poster Abstracts
- Call For Papers
- SNEB
  - Back
  - Visit SNEB
  - Join SNEB
  - Member Access Instructions
  - Society News

Go search

All contentArticle titleAuthorsKeywordsAbstractArticle title, abstract, keywords

Advanced searchSave search

Please enter a term before submitting your search.

 Ok

- Submit     
  Member Login
- Log in
- Register
- Log in

  - Submit     
    Member Login
  - Log in
- Subscribe
- Claim

Access provided by

Skip menu

## Login to your account

Email/Username

Password

Show

Forgot password?

Remember me

Don’t have an account?

Create a Free Account

If you don't remember your password, you can reset it by entering your email address and clicking the Reset Password button. You will then receive an email that contains a secure link for resetting your password

Email\*

If the address matches a valid account an email will be sent to \_\_email\_\_ with instructions for resetting your password

Cancel

Abstract|
Volume 52, ISSUE 7, SUPPLEMENT , S87, July 2020

- Purchase

  - Academic & Personal: 24 hour online access
  - Corporate R&D Professionals: 24 hour online access
- Subscribe
- Save

  - Add To Online LibraryPowered ByMendeley
  - Add To My Reading List
  - Export Citation
  - Create Citation Alert
- Share

  Share on
  - Twitter
  - Facebook
  - Linked In
  - Sina Weibo
- more

  - Reprints
  - Request
- Top

# P149 Fruit and Vegetable Consumption of Michigan Youth and Adults: Locally Implemented SNAP-Ed Programs with Aggregated Impact

- Marci Scott, PhD,RDN 

  Marci Scott

  Affiliations

  Michigan Fitness Foundation

  Search for articles by this author
- Kerri Vasold, PhD, ACSM-PAPHS 

  Kerri Vasold

  Affiliations

  Michigan Fitness Foundation

  Search for articles by this author
- Lila Gutuskey, PhD 

  Lila Gutuskey

  Contact

  Affiliations

  Michigan Fitness Foundation, 1213 Center St, Lansing, MI 48906

  Search for articles by this author

DOI:https://doi.org/10.1016/j.jneb.2020.04.196

P149 Fruit and Vegetable Consumption of Michigan Youth and Adults: Locally Implemented SNAP-Ed Programs with Aggregated Impact

Previous ArticleP148 California SNAP-Ed Direct Education and PSE Aggregation

Next ArticleP150 Development of an 8-Week Early Childhood Nutrition Education Intervention for Children with Autism Spectrum Disorder and their Parents

### Objective

Supplemental Nutrition Assistance Program Education (SNAP-Ed) at the Michigan Fitness
Foundation is a collaboration of local and regional organizations whose work focuses
on improving the health of Michigan's most vulnerable citizens. While organizations
select and implement locally relevant programming, evaluation plans are designed to
report common fruit and vegetable consumption measures aligned with the SNAP-Ed Evaluation
Framework.

### Use of Theory or Research

Aligned with the social ecological framework, SNAP-Ed works to address factors of
health behavior across multiple levels of influence. While there is broad literature
and understanding on the factors that influence healthy eating, programs can do the
most good by addressing the local needs of the communities they serve.

### Target Audience

Youth (grades 6-12) and adults (aged 18+) who received SNAP-Ed programming that included
evidence-based nutrition education interventions based on local needs assessments.

### Program Description

Design a common program evaluation that could be applied to a variety of direct education
interventions to support local-level objectives and be aggregated to demonstrate state-level
outcomes.

### Evaluation Methods

Participants received a dietary questionnaire pre- and post-intervention. Participant
data were matched based on demographic indicators and data were aggregated at the
state-level. Descriptive statistics were calculated for all variables of interest,
and Wilcoxon Signed Rank tests were used to compare differences pre- and post-intervention
for fruit and vegetable consumption.

### Results

Participants included 1512 youth and 647 adults from SNAP-Ed programs delivered by
20 community organizations across Michigan. A statistically significant increase was
found for youth frequency of fruit consumption (pre: 1.62 ± 1.62; post: 1.75 ± 1.69;
*P* = .022) and of vegetable consumption (pre: 1.70 ± 1.97; post: 1.88 ± 2.17; *P* = .002). Results were similar for adults with a statistically significant increase
in frequency of fruit consumption (pre: 3.17 ± 1.23; post: 3.66 ± 1.19; *P* < .001) and of vegetable consumption (pre: 3.35 ± 1.14; post: 3.80 ± 1.14; *P* < .001).

### Conclusions

Implementation of locally relevant SNAP-Ed programming selected by community organizations
can positively impact fruit and vegetable consumption. Future research should explore
characteristics across locally relevant programs to identify key implementation variables
for greatest impact.

To read this article in full you will need to make a payment

### Purchase one-time access:

Academic & Personal: 24 hour online accessCorporate R&D Professionals: 24 hour online access

### SNEB Member Login

SNEB Members, full access to the journal is a member benefit. Login via the SNEB Website to access all journal content and features.

### Subscribe:

Subscribe to *Journal of Nutrition Education and Behavior*

Already a print subscriber? Claim online access

Already an online subscriber? Sign in

Register: Create an account

Institutional Access: Sign in to ScienceDirect

## Article info

### Identification

DOI: https://doi.org/10.1016/j.jneb.2020.04.196

### Copyright

© 2020 Published by Elsevier Inc.

### ScienceDirect

Access this article on ScienceDirect

## Related Articles

Hide CaptionDownloadSee figure in Article

Toggle Thumbstrip

- Download Hi-res image
- Download .PPT

- Articles & Issues
- Articles In Press
- Current Issue
- List of Issues
- Supplements
- For Authors
- Author Guidelines
- Submit Your Manuscript
- Statistical Methods
- Guidelines for Authors of Educational Material Reviews
- Permission to Reuse
- About Open Access
- Researcher Academy
- For Reviewers
- General Guidelines
- Methods Paper Guidelines
- Qualitative Guidelines
- Quantitative Guidelines
- Questionnaire Methods Guidelines
- Statistical Methods Guidelines
- Systematic Review Guidelines
- Perspective Guidelines
- GEM Reviewing Guidelines
- Journal Info
- About the Journal
- Policies
- Disclosures
- About Open Access
- Abstracting/Indexing
- Impact/Metrics
- Awards
- Contact Information
- Editorial Staff and Board
- Info for Advertisers
- Member Access Instructions
- New Content Alerts
- Pricing
- Reprints
- Sponsored Supplements
- Statistical Reviewers
- Media
- Reviewer Appreciation
- New Resources
- New Resources for Nutrition Educators
- Submit New Resources for Review
- Guidelines for Writing Reviews of New Resources for Nutrition Educators
- Podcast/Webinars
- New Resources Podcasts
- Press Release & Other Podcasts
- Webinars
- Collections
- SNEB
- Visit SNEB
- Join SNEB
- Member Access Instructions
- Society News
- Follow Us
- Twitter
- Facebook
- RSS Feeds

We use cookies to help provide and enhance our service and tailor content. To update your cookie settings, please visit the
Cookie Preference Center for this site.

Copyright © 2023 Elsevier Inc. except certain content provided by third parties. The content on this site is intended for healthcare professionals.
  
  

- Privacy Policy
- Terms and Conditions
- Accessibility
- Help & Contact
